# Supplementary material
Source: PubMed Central journal article supplement (PMC3107322)

# Figure S1

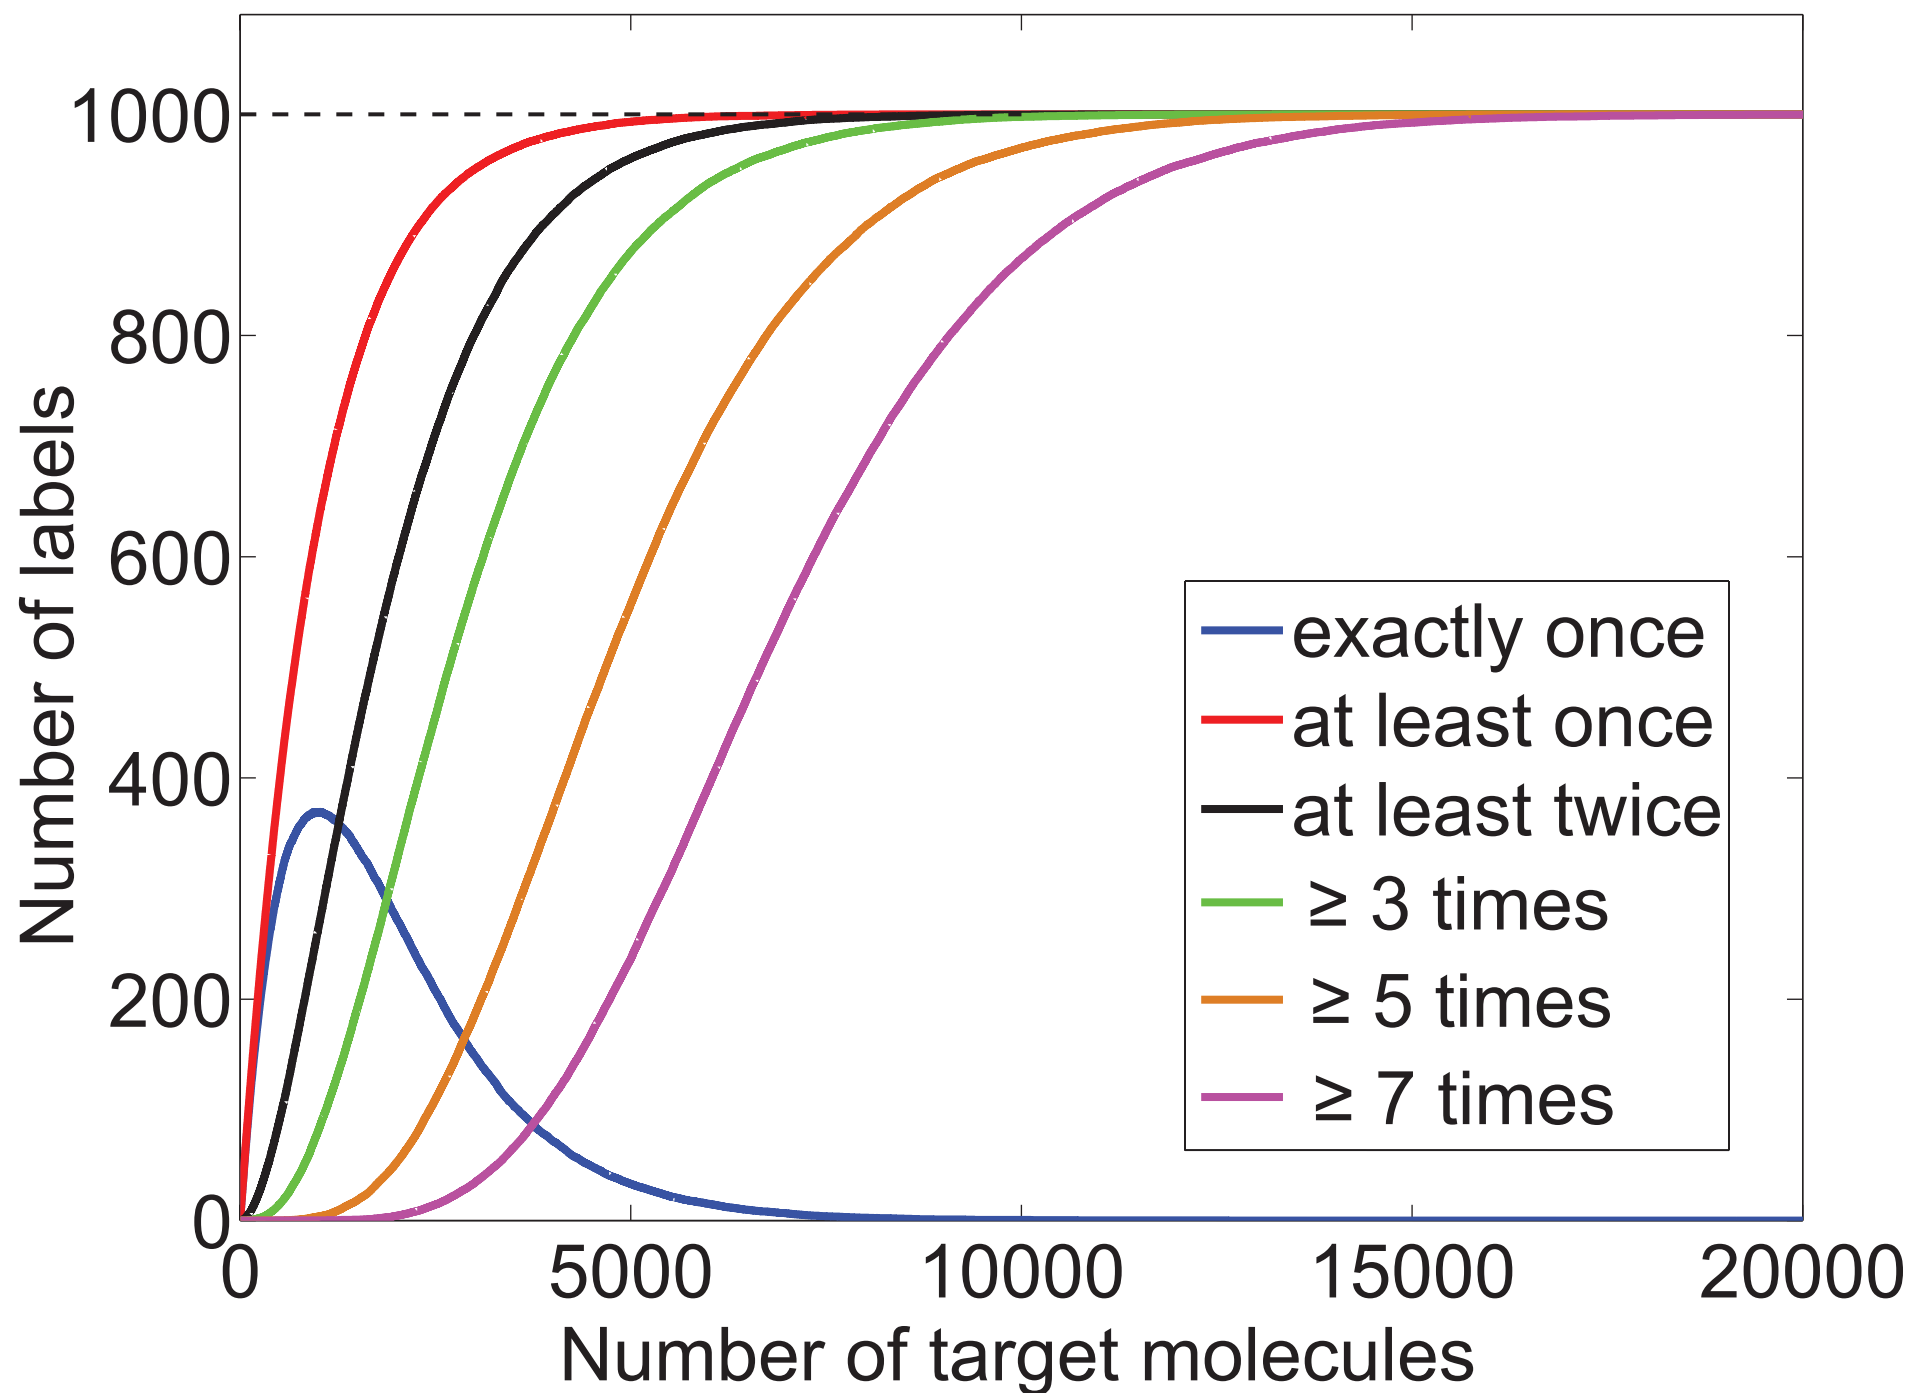

Supplement: 1017621108_SF01.pdf [file 1017621108_SF01.pdf]

Figure S2

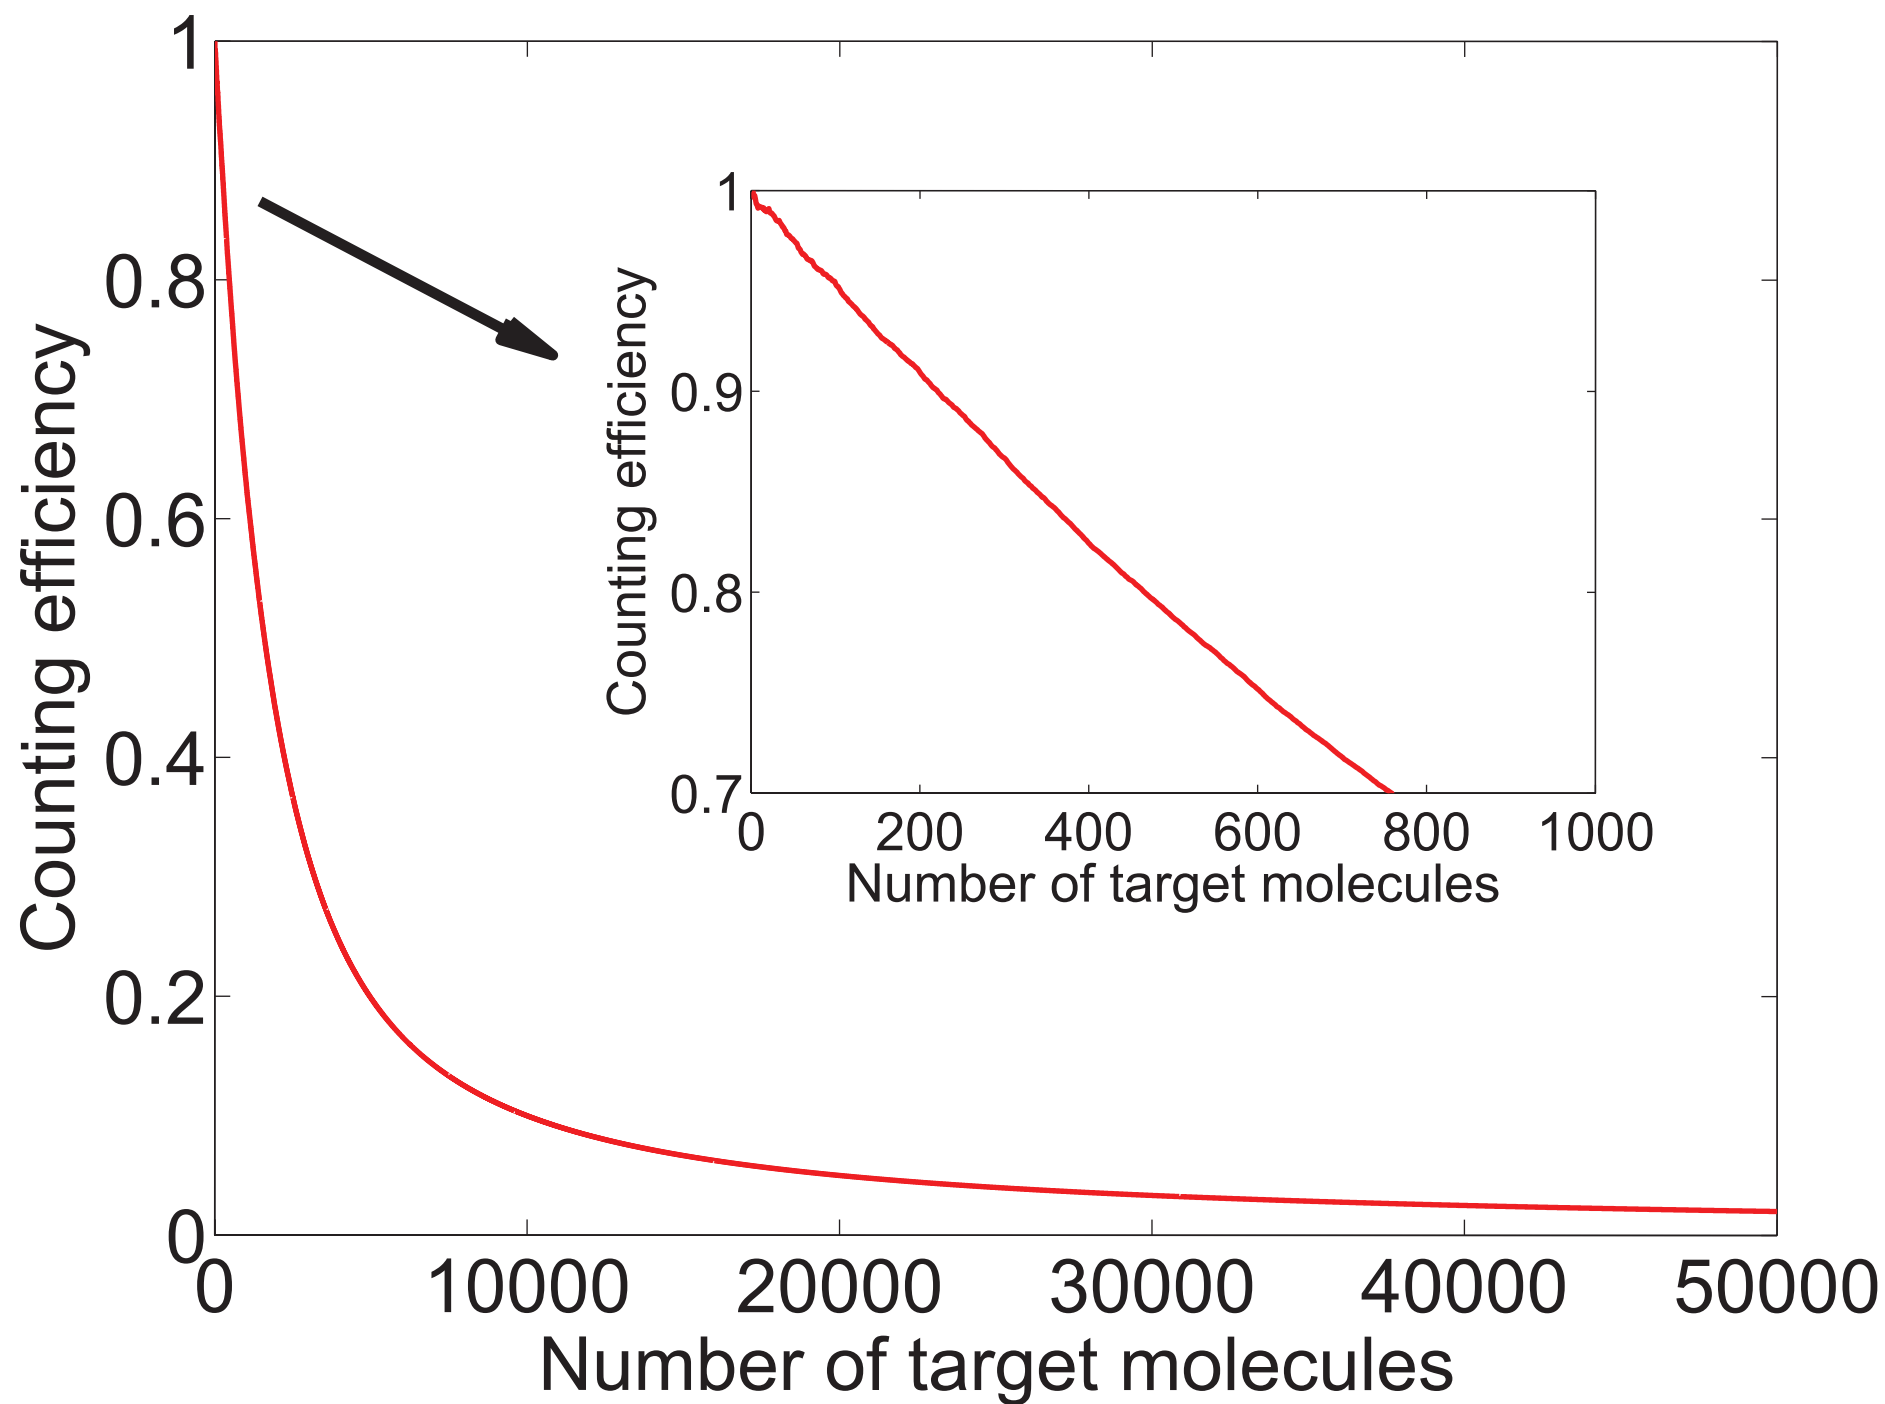

Supplement: 1017621108_SF02.pdf [file 1017621108_SF02.pdf]

Figure S6

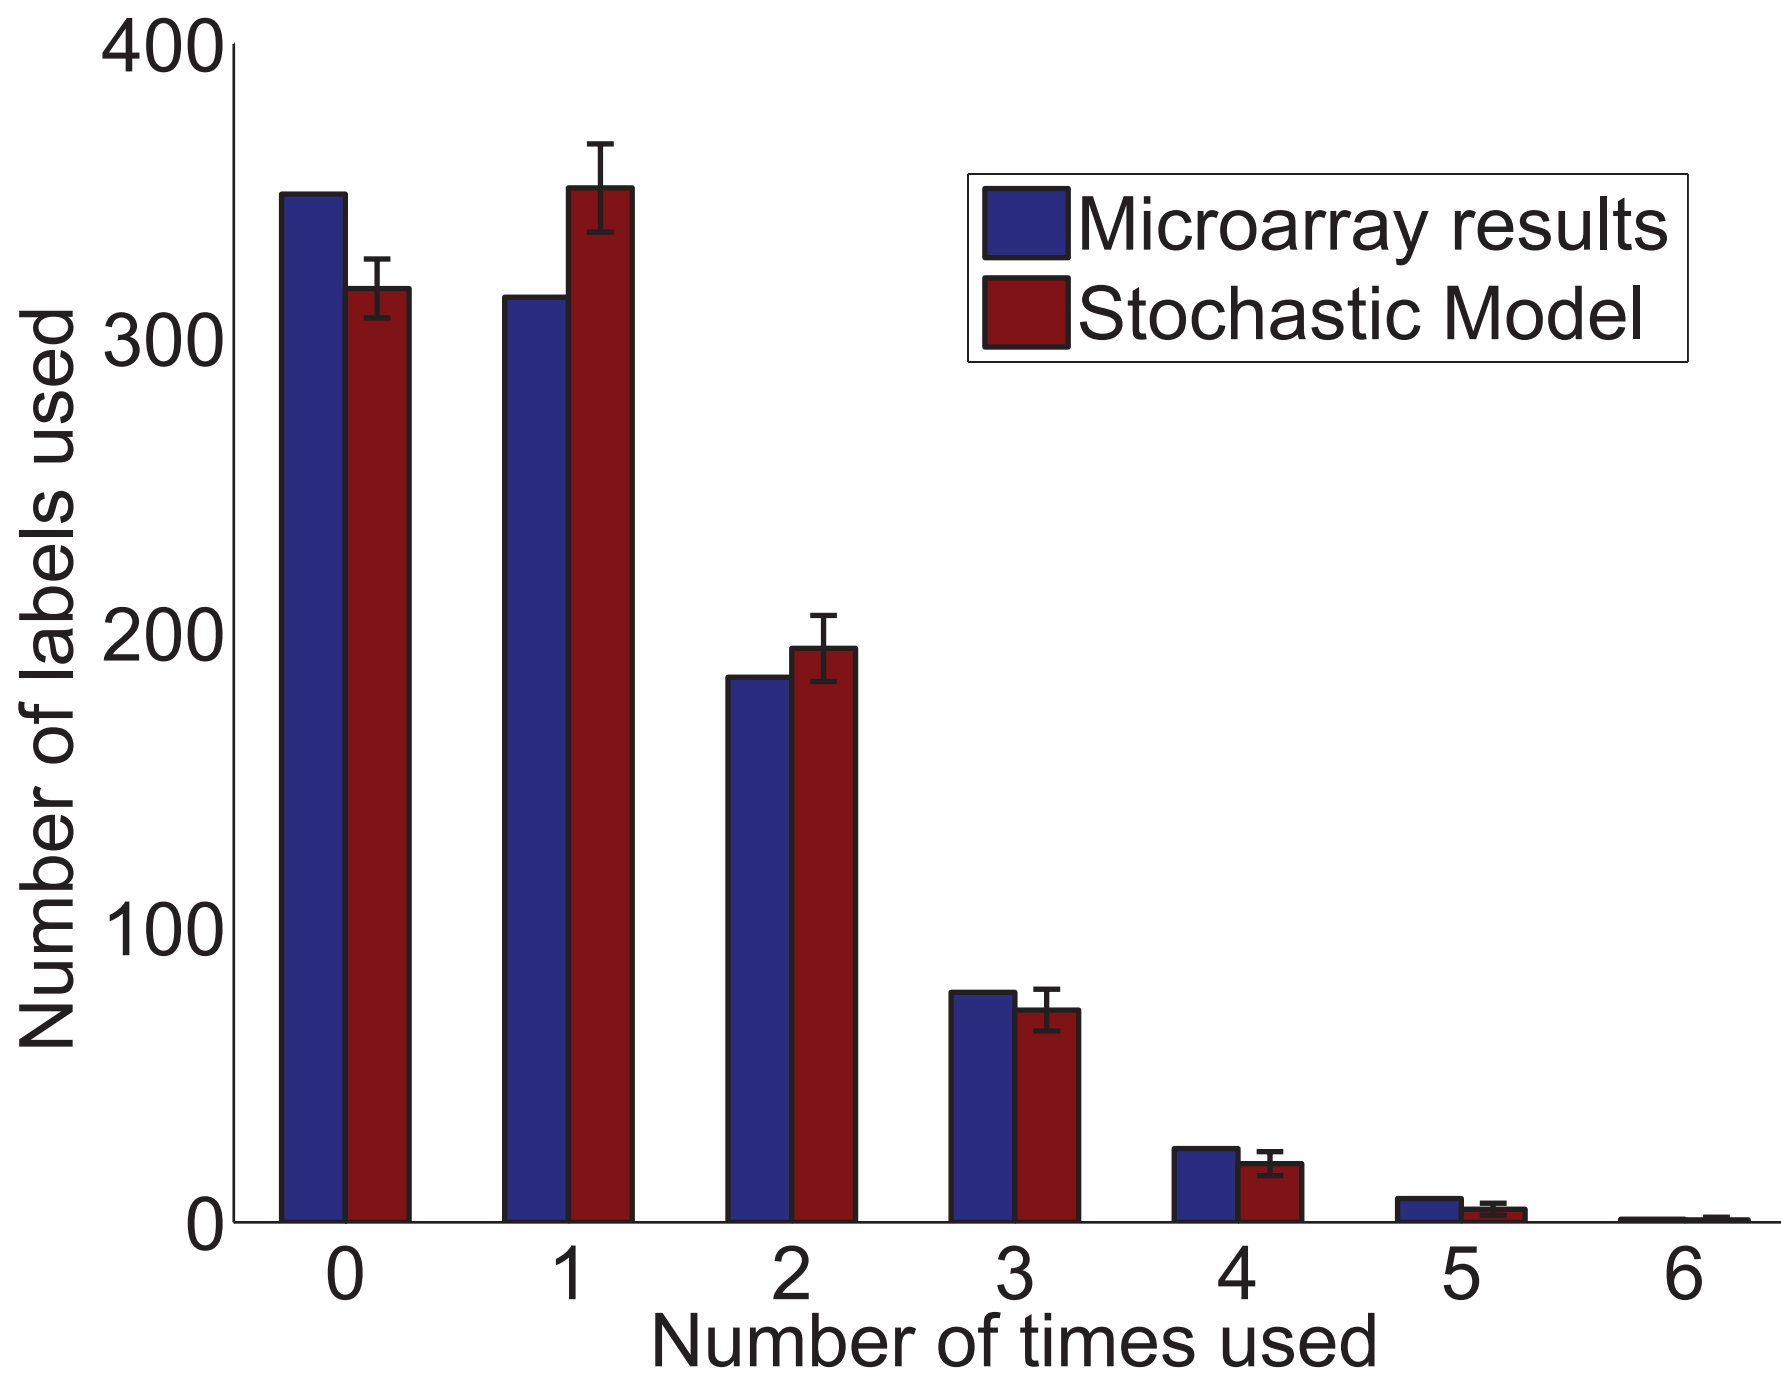

Supplement: 1017621108_SF06.pdf [file 1017621108_SF06.pdf]
